# Supplementary material for: Glycol Derived Carbon- TiO2 as Low Cost and High Performance Anode Material for Sodium-Ion Batteries
Source: PubMed Central journal article supplement (PMC5335553; doi:10.1038/srep43895), 2017-03-03
Supplement: srep43895-s1.pdf [file srep43895-s1.pdf]

## Supporting Information

**Title:** Glycol Derived Carbon- TiO<sub>2</sub> as Low Cost and High Performance Anode Material for Sodium-Ion Batteries

Hongwei Tao<sup>†</sup>, Min Zhou<sup>†</sup>, Kangli Wang<sup>\*</sup>, Shijie Cheng, Kai Jiang<sup>\*</sup>

<sup>†</sup> These authors contributed equally to this work

### 1. FTIR-Spectra of TiO<sub>2</sub>-raw, TiO<sub>2</sub>@C and TiO<sub>2</sub>

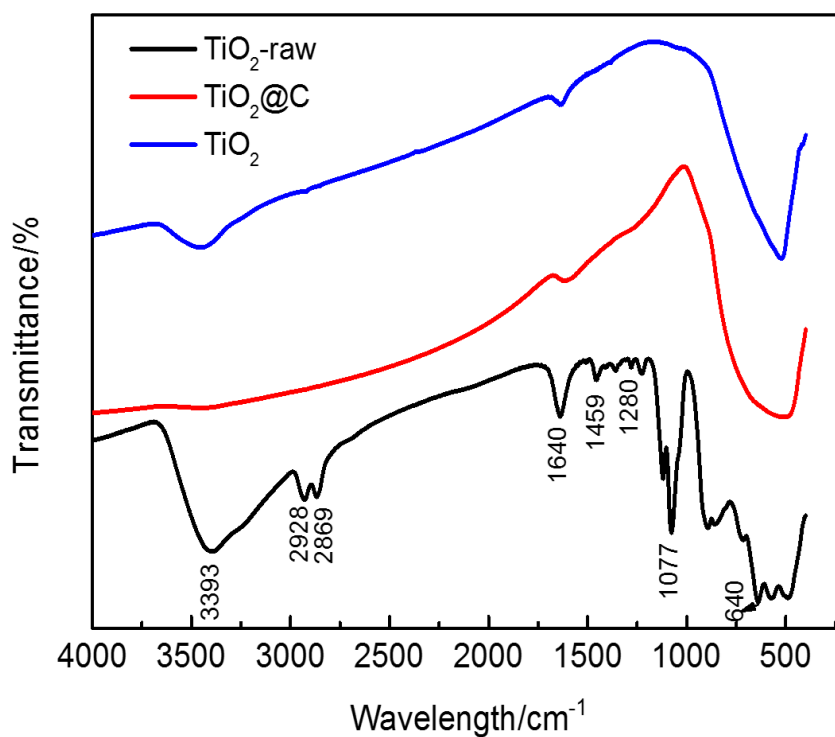

**Fig. S1** FTIR-Spectra of TiO<sub>2</sub>-raw, TiO<sub>2</sub>@C and TiO<sub>2</sub>

The FT-IR spectrum of the TiO<sub>2</sub>-raw material reflects all the characteristic absorptions of the typical precursor Ti[(OCH<sub>2</sub>CH<sub>2</sub>)<sub>n</sub>O]<sub>2</sub>. The peaks of 3393 cm<sup>-1</sup> and 1640 cm<sup>-1</sup> are assigned to the stretching vibrations of O-H, corresponding to the adsorbed water.<sup>1,2</sup> The bands located at 2928 cm<sup>-1</sup> and 2869 cm<sup>-1</sup> belong to the stretching vibrations of C-H.<sup>3-6</sup> The peak at 1459 cm<sup>-1</sup> is assigned to O-CH<sub>2</sub> bending vibration.<sup>3-5</sup> Three peaks at 1359 cm<sup>-1</sup>, 1280 cm<sup>-1</sup> and 1226 cm<sup>-1</sup> can be attributed to C-H wagging and twisting vibration, respectively.<sup>3-5</sup> The peak at around 1119 cm<sup>-1</sup> and 1077 cm<sup>-1</sup> is assigned to the C-O and C-O-C stretching vibration, indicating the formation of polyethyleneglycol.<sup>3-5</sup> The bands at 640 cm<sup>-1</sup> and 575 cm<sup>-1</sup> can be assigned to Ti-O-C, while the band at 490 cm<sup>-1</sup> is the characteristic of the Ti-O-Ti stretching and bending vibration, indicating the coordination of the polymer with Ti<sup>4+</sup>.<sup>6</sup> All the adsorption bands stated above suggest the formation of the polymeric ligand, which pyrolyze and convert to carbon coated TiO<sub>2</sub> particles in the subsequent annealing process.

## 2. X-ray photoelectron spectroscopic (XPS) spectra of TiO<sub>2</sub>@C.

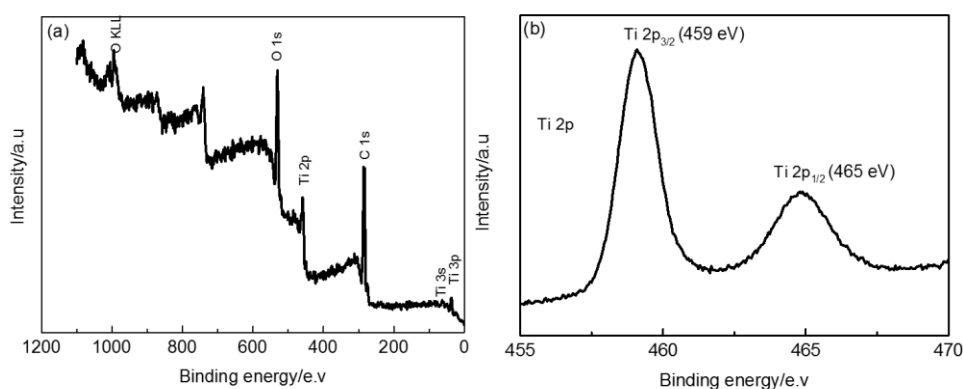

**Fig. S2** Typical XPS spectra of the TiO<sub>2</sub>@C: (a) survey spectra, (b) Ti 2p region XPS spectrum.

3. The photo images of the  $\text{TiO}_2@\text{C}$  and  $\text{TiO}_2$ .

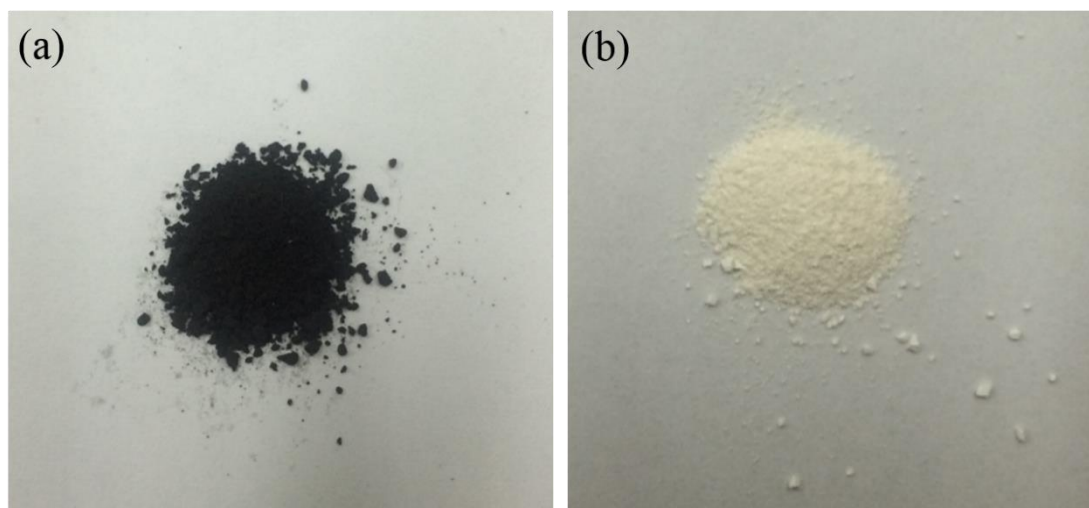

**Fig.S3** The photo images of the (a) $\text{TiO}_2@\text{C}$  and (b) $\text{TiO}_2$ .

4. **TEM images of  $\text{TiO}_2$ .**

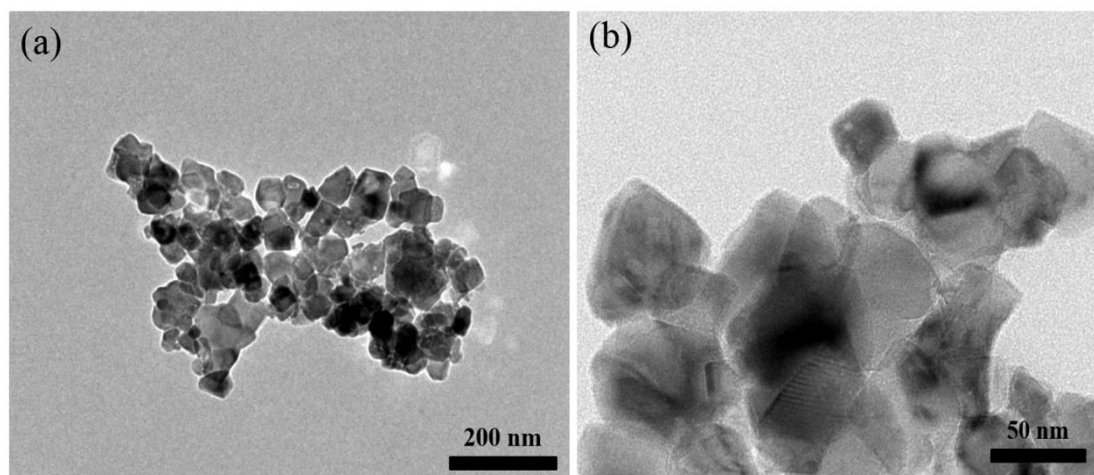

**Fig.S4** TEM images of  $\text{TiO}_2$ : (a) Low and (b) high magnification.

5. **The electrochemical performance of  $\text{TiO}_2$  electrode**

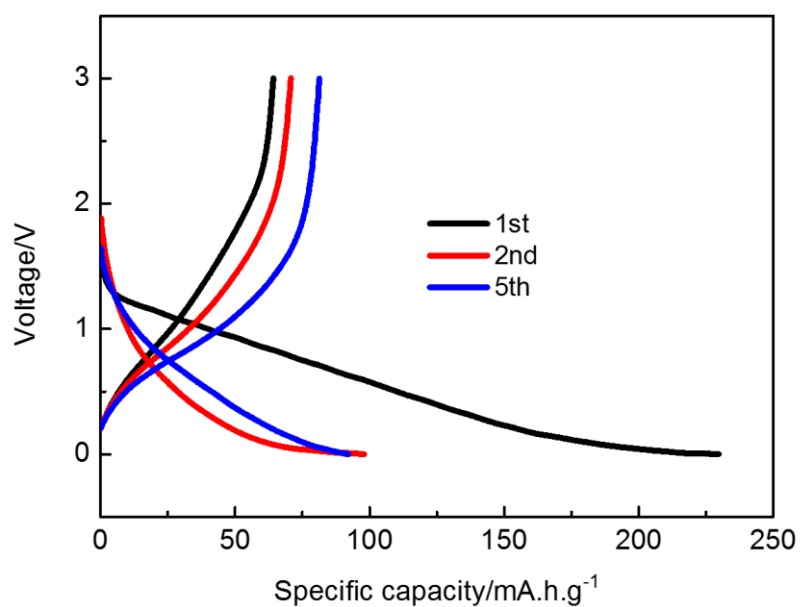

**Fig. S5.** The charge-discharge profiles of TiO<sub>2</sub> electrode in 1.0 mol L<sup>-1</sup> NaPF<sub>6</sub> + EC-DEC (v/v=1/1) electrolyte at the current density of 0.05 A g<sup>-1</sup> in a voltage range of 0 to 3 V.

## 6. The electrochemical performance of carbon additives (acetylene black)

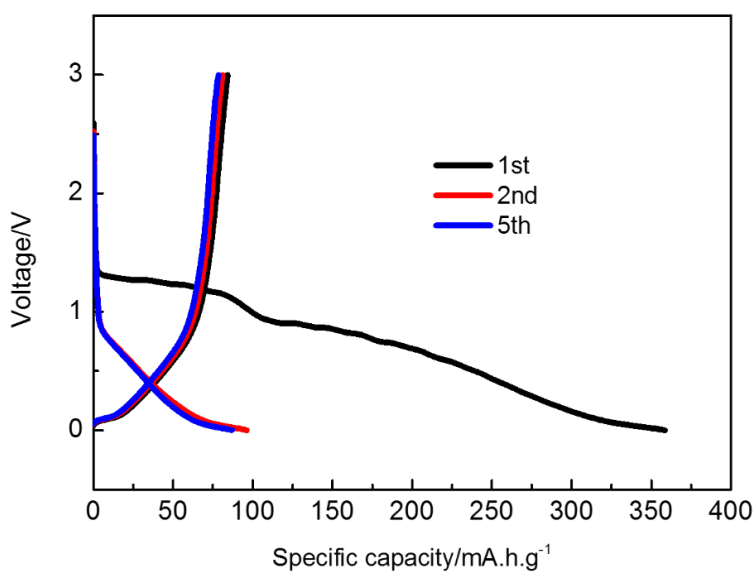

**Fig. S6.** The charge-discharge profiles of acetylene black (AB) in 1.0 mol L<sup>-1</sup> NaPF<sub>6</sub> +EC-DEC (v/v=1/1) electrolyte at the current density of 0.05 A g<sup>-1</sup> in a voltage range of 0 to 3 V.

As shown in Fig. S3, the carbon additive acetylene black (AB) can deliver a reversible capacity of 76.8 mAh g<sup>-1</sup> at the current densities of 0.05 A g<sup>-1</sup>. As the weight ratio of TiO<sub>2</sub>/AB=8:1, the capacity contribution of the carbon additive is calculated to be 9.6 mAh g<sup>-1</sup>.

### 7. Electrochemical impedance spectra (EIS) of the TiO<sub>2</sub>@C and TiO<sub>2</sub> at fully charge state after 100 cycles.

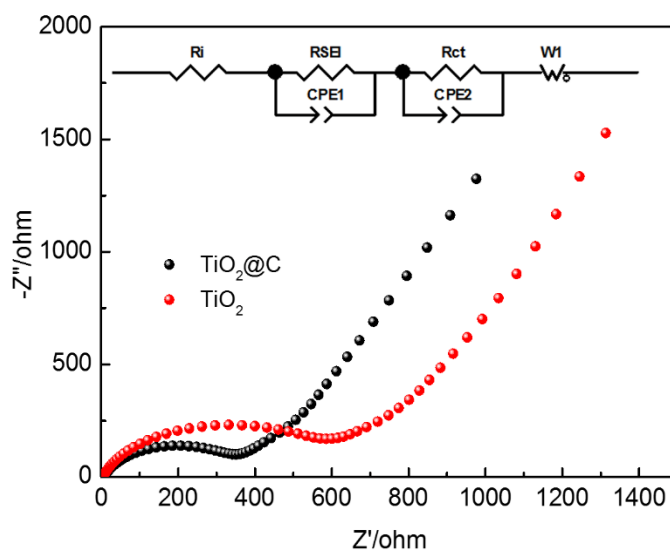

**Fig. S7.** Electrochemical impedance spectra (EIS) of the (a) TiO<sub>2</sub>@C and (b) TiO<sub>2</sub> at fully charge state after 100 cycles.

Table S1 Fitting results of the Nyquist plots using the equivalent circuit.

| samples | R <sub>i</sub> (Ω) | R <sub>SEI</sub><br>(Ω) | CPE <sub>1</sub> (F) | R <sub>ct</sub> (Ω) | CPE <sub>2</sub> (F) | Chi-Squared |
|---------|--------------------|-------------------------|----------------------|---------------------|----------------------|-------------|
|---------|--------------------|-------------------------|----------------------|---------------------|----------------------|-------------|

|                     |     |      |                      |       |                      |                      |
|---------------------|-----|------|----------------------|-------|----------------------|----------------------|
| TiO <sub>2</sub> @C | 3.2 | 13.3 | $1.4 \times 10^{-5}$ | 305.4 | $8.0 \times 10^{-5}$ | $1.0 \times 10^{-3}$ |
| TiO <sub>2</sub>    | 3.3 | 87.2 | $1.5 \times 10^{-3}$ | 403.9 | $1.5 \times 10^{-5}$ | $1.0 \times 10^{-3}$ |

## Reference

- 1 Mansur, H. S., Orfice, R. L. & Mansur, A. A. Characterization of poly (vinyl alcohol)/poly (ethylene glycol) hydrogels and PVA-derived hybrids by small-angle X-ray scattering and FTIR spectroscopy. *Polymer* **45**, 7193-7202 (2004).
- 2 Zhang, Y., Kohler, N. & Zhang, M. Surface modification of superparamagnetic magnetite nanoparticles and their intracellular uptake. *Biomaterials* **23**, 1553-1561 (2002).
- 3 Brubach, J. *et al.* Structural and thermal characterization of mono- and diacyl polyoxyethylene glycol by infrared spectroscopy and X-ray diffraction coupled to differential calorimetry. *The Journal of Physical Chemistry B* **108**, 17721-17729 (2004).
- 4 Evans, C. C., Bates, F. S. & Ward, M. D. Control of hierarchical order in crystalline composites of diblock copolymers and a molecular chromophore. *Chemistry of materials* **12**, 236-249 (2000).
- 5 Jeevanandam, P. & Vasudevan, S. Intercalation of Alkali Metal-Polyethylene Oxide Polymer Electrolytes in Layered CdPS3. *Chemistry of materials* **10**, 1276-1285 (1998).
- 6 Wang, D., Yu, R., Kumada, N. & Kinomura, N. Hydrothermal synthesis and characterization of a novel one-dimensional titanium glycolate complex single crystal: Ti (OCH<sub>2</sub>CH<sub>2</sub>O)<sub>2</sub>. *Chemistry of materials* **11**, 2008-2012 (1999).
